# Supplementary material for: Chemical Survey and Risk Assessment of 56 Pesticides in the Sado River Estuary (Iberian Peninsula, Portugal)
Source: MDPI journal article supplement (doi:10.3390/toxics11050457), 2023-05-14
Supplement: s1 [file s1]

**Table S2** - Data referring to the statistics on **Figure 2**.

| FUNGICIDES |         |         |         |         |         |         |         |   |   |
|------------|---------|---------|---------|---------|---------|---------|---------|---|---|
|            | A       | B       | C       | D       | E       | F       | G       | H | I |
| A          |         |         |         |         |         |         |         |   |   |
| B          | 1,1E-12 |         |         |         |         |         |         |   |   |
| C          | 1,8E-12 |         |         |         |         |         |         |   |   |
| D          | 1,1E-12 |         |         |         |         |         |         |   |   |
| E          | 8,1E-11 |         |         | 2,8E-02 |         |         |         |   |   |
| F          | 1,1E-12 |         |         |         | 1,1E-03 |         |         |   |   |
| G          | 1,1E-12 | 1,6E-08 | 1,4E-10 | 5,1E-08 | 2,1E-12 | 2,0E-06 |         |   |   |
| H          | 1,3E-09 | 6,2E-03 |         | 2,1E-03 |         | 6,1E-05 | 1,2E-12 |   |   |
| I          | 3,3E-11 |         |         |         |         |         | 2,1E-09 |   |   |

| HERBICIDES |         |         |         |         |         |         |         |         |   |
|------------|---------|---------|---------|---------|---------|---------|---------|---------|---|
|            | A       | B       | C       | D       | E       | F       | G       | H       | I |
| A          |         |         |         |         |         |         |         |         |   |
| B          | 1,9E-10 |         |         |         |         |         |         |         |   |
| C          | 1,3E-08 |         |         |         |         |         |         |         |   |
| D          | 8,0E-10 |         |         |         |         |         |         |         |   |
| E          | 2,9E-07 |         |         |         |         |         |         |         |   |
| F          | 7,0E-11 |         |         |         |         |         |         |         |   |
| G          | 7,2E-10 |         |         |         |         |         |         |         |   |
| H          |         | 2,4E-06 | 1,9E-04 | 1,1E-05 | 3,8E-03 | 8,2E-07 | 1,0E-05 |         |   |
| I          | 1,2E-06 |         |         |         |         |         |         | 5,1E-03 |   |

| INSECTICIDES |         |         |         |         |         |         |         |         |   |
|--------------|---------|---------|---------|---------|---------|---------|---------|---------|---|
|              | A       | B       | C       | D       | E       | F       | G       | H       | I |
| A            |         |         |         |         |         |         |         |         |   |
| B            | 1,9E-10 |         |         |         |         |         |         |         |   |
| C            | 1,3E-08 |         |         |         |         |         |         |         |   |
| D            | 8,0E-10 |         |         |         |         |         |         |         |   |
| E            | 2,9E-07 |         |         |         |         |         |         |         |   |
| F            | 7,0E-11 |         |         |         |         |         |         |         |   |
| G            | 7,2E-10 |         |         |         |         |         |         |         |   |
| H            |         | 2,4E-06 | 1,9E-04 | 1,1E-05 | 3,8E-03 | 8,2E-07 | 1,0E-05 |         |   |
| I            | 1,2E-06 |         |         |         |         |         |         | 5,1E-03 |   |
