# Supplementary material for: Chemical Survey and Risk Assessment of 56 Pesticides in the Sado River Estuary (Iberian Peninsula, Portugal)
Source: MDPI journal article supplement (doi:10.3390/toxics11050457), 2023-05-14
Supplement: s1 [file s1]

**Table S3** – Data referring to the PCAs of fungicides, herbicides and insecticides.

| <b>Fungicides</b>         | PC 1 | PC 2  |       |       |       |      |
|---------------------------|------|-------|-------|-------|-------|------|
| Azoxystrobin              | 0.41 | -0.41 |       |       |       |      |
| Difenoconazole            | 0.21 | 0.82  |       |       |       |      |
| Hexachlorobenzene         | 0.46 | 0.14  |       |       |       |      |
| Pentachlorobenzene        | 0.39 | 0.26  |       |       |       |      |
| Procymidone               | 0.48 | -0.25 |       |       |       |      |
| <b>Herbicides</b>         | PC 1 | PC 2  | PC 3  |       |       |      |
| Alachlor                  | 0.28 | -0.12 | 0.20  |       |       |      |
| Atrazine                  | 0.24 | -0.28 | 0.20  |       |       |      |
| Atrazine-desethyl         | 0.23 | -0.36 | 0.33  |       |       |      |
| Cyanazine                 | 0.30 | 0.03  | 0.03  |       |       |      |
| Cyhalofop-butyl           | 0.27 | -0.24 | -0.09 |       |       |      |
| Metolachlor               | 0.24 | 0.10  | -0.48 |       |       |      |
| Metribuzin                | 0.23 | 0.41  | -0.21 |       |       |      |
| Pendimethalin             | 0.26 | -0.32 | 0.09  |       |       |      |
| Propazine                 | 0.24 | 0.43  | 0.28  |       |       |      |
| Propyzamide               | 0.28 | 0.16  | 0.14  |       |       |      |
| Simazine                  | 0.27 | -0.06 | -0.19 |       |       |      |
| Simetryn                  | 0.29 | -0.14 | -0.07 |       |       |      |
| Terbuthylazine            | 0.23 | 0.43  | 0.37  |       |       |      |
| Terbutryn                 | 0.27 | 0.10  | -0.10 |       |       |      |
| <b>Insecticides</b>       | PC 1 | PC 2  | PC 3  | PC 4  | PC 5  | PC 6 |
| Aldrin                    | 0.19 | -0.16 | -0.05 | -0.01 | -0.02 | 0.00 |
| Azinphos-methyl           | 0.13 | 0.36  | 0.05  | -0.10 | -0.15 | 0.00 |
| Chlordane-gamma           | 0.14 | 0.32  | -0.17 | -0.13 | -0.11 | 0.00 |
| Chlorpyrifos              | 0.19 | -0.17 | -0.03 | 0.00  | -0.05 | 0.00 |
| Chlorfenvinphos Z         | 0.20 | -0.17 | -0.03 | 0.00  | 0.04  | 0.00 |
| Cyfluthrin                | 0.20 | -0.14 | -0.07 | -0.01 | -0.01 | 0.00 |
| Cyhalothrin-lambda        | 0.19 | 0.08  | -0.16 | -0.09 | -0.15 | 0.00 |
| Cypermethrin-alpha        | 0.20 | 0.04  | -0.13 | -0.07 | -0.03 | 0.00 |
| DDD                       | 0.18 | -0.24 | -0.02 | 0.03  | 0.03  | 0.00 |
| DDE                       | 0.17 | -0.27 | 0.01  | 0.04  | 0.03  | 0.00 |
| DDT                       | 0.19 | -0.04 | -0.23 | -0.03 | 0.08  | 0.00 |
| Deltamethrin              | 0.21 | -0.02 | 0.02  | -0.02 | -0.06 | 0.00 |
| Diazinon                  | 0.20 | -0.02 | 0.00  | -0.01 | 0.13  | 0.00 |
| Dichlorvos                | 0.06 | 0.13  | 0.01  | -0.21 | 0.82  | 0.00 |
| Dieldrin                  | 0.19 | -0.22 | 0.03  | 0.02  | 0.03  | 0.00 |
| Dimethoate                | 0.17 | 0.03  | 0.11  | -0.08 | -0.04 | 0.00 |
| Endosulfan-alfa           | 0.21 | -0.08 | -0.02 | -0.02 | 0.02  | 0.00 |
| Endosulfan-beta           | 0.19 | -0.19 | -0.06 | 0.00  | 0.03  | 0.00 |
| Endosulfan-sulphate       | 0.14 | 0.33  | -0.16 | 0.12  | -0.01 | 0.00 |
| Endrin                    | 0.19 | -0.16 | -0.03 | 0.00  | -0.08 | 0.00 |
| Fenamiphos                | 0.19 | -0.11 | 0.02  | -0.01 | -0.14 | 0.00 |
| Fenitrothion              | 0.14 | 0.12  | 0.37  | 0.02  | -0.13 | 0.00 |
| Fonofos                   | 0.16 | 0.12  | 0.36  | -0.01 | -0.12 | 0.00 |
| Heptachlor                | 0.03 | 0.02  | -0.03 | 0.79  | 0.10  | 0.00 |
| Heptachlor epoxide        | 0.11 | 0.21  | -0.16 | 0.45  | 0.02  | 0.00 |
| Hexachlorocyclopentadiene | 0.00 | 0.00  | 0.00  | 0.00  | 0.00  | 1.00 |
| Lindane                   | 0.12 | 0.20  | -0.39 | -0.01 | 0.18  | 0.00 |

|                  |      |       |       |       |       |      |
|------------------|------|-------|-------|-------|-------|------|
| Malathion        | 0.17 | 0.07  | 0.23  | 0.13  | 0.21  | 0.00 |
| Methoxychlor     | 0.18 | 0.15  | -0.11 | 0.00  | -0.18 | 0.00 |
| Mirex            | 0.19 | 0.06  | -0.25 | -0.09 | -0.02 | 0.00 |
| Parathion-ethyl  | 0.17 | 0.16  | 0.27  | 0.13  | 0.04  | 0.00 |
| Parathion-methyl | 0.12 | 0.30  | 0.19  | -0.13 | 0.05  | 0.00 |
| Phosmet          | 0.17 | 0.01  | 0.33  | 0.03  | 0.04  | 0.00 |
| Pirimicarb       | 0.17 | -0.05 | 0.17  | 0.02  | 0.21  | 0.00 |

---
