# Supplementary material for: Chemical Survey and Risk Assessment of 56 Pesticides in the Sado River Estuary (Iberian Peninsula, Portugal)
Source: MDPI journal article supplement (doi:10.3390/toxics11050457), 2023-05-14
Supplement: s1 [file s1]

**Table S1** – Quantification and diagnostic ions used in GC-MS/MS analyses. The relative abundance of ions ( $m/z$ ) for each target pesticide is between brackets.

| Pesticides                | Molecular mass<br>g/mol | RT<br>(min) | Target ion<br>(t) | Q1<br>(%Q1/t) | Q2<br>(%Q2/t) | Q3<br>(%Q3/t) | Q 4<br>(%Q4/t) | Precursor    | Products |     |     | EV   | Ranges          |
|---------------------------|-------------------------|-------------|-------------------|---------------|---------------|---------------|----------------|--------------|----------|-----|-----|------|-----------------|
| PeCB                      | 250.3                   | 9.55        | <b>250</b>        | 248 (65.1)    | 252 (66.1)    |               |                | <b>250</b> → | 215      | 144 |     | 2.01 | 143-251         |
| Trifluralin               | 335.3                   | 10.90       | <b>264</b>        | 306 (44.9)    | 206 (27.2)    |               |                | <b>264</b> → | 206      | 160 | 188 | 1.05 | 159-265         |
| Atrazine-desethyl         | 187.6                   | 10.93       | <b>172</b>        | 68 (32.2)     | 174 (29.2)    |               |                | <b>172</b> → | 130      | 145 | 152 | 1.15 | 104-173         |
| Propazine                 | 229.7                   | 11.66       | <b>214</b>        | 172 (70.6)    | 187 (38.0)    |               |                | <b>214</b> → | 200      | 172 | 138 | 1.20 | 137-215         |
| HCB <sup>b</sup>          | 284.8                   | 11.68       | <b>284</b>        | 282 (46.4)    | 249 (41.2)    |               |                | <b>284</b> → | 214      | 249 |     | 1.50 | 211-285         |
| Dimethoate                | 229.3                   | 11.77       | <b>87</b>         | 93 (52.5)     | 125 (44.3)    |               |                | <b>87</b> →  | 86       | 59  |     | 1.10 | 53-88           |
| Simazine <sup>a</sup>     | 201.6                   | 11.88       | <b>201</b>        | 186 (67.1)    | 173 (51.9)    | 44 (37.6)     |                | <b>201</b> → | 186      | 174 | 138 | 1.20 | 135-201         |
| <u>ATZ-ds</u>             | 220.7                   | 11.95       | <b>205</b>        | 220 (43.0)    | 178 (41.7)    |               |                | <b>205</b> → | 127      | 137 | 105 | 1.25 | 104-206         |
| Atrazine <sup>b</sup>     | 215.7                   | 12.00       | <b>200</b>        | 215 (56.8)    | 173 (36.9)    |               |                | <b>200</b> → | 122      | 132 | 164 | 1.25 | 121-201         |
| Lindane <sup>a</sup>      | 290.8                   | 12.33       | <b>181</b>        | 183 (76.6)    | 219 (69.3)    |               |                | <b>181</b> → | 145      | 146 |     | 1.20 | 108-184         |
| Terbutylazine             | 229.7                   | 12.41       | <b>214</b>        | 173 (71.8)    | 138 (27.3)    | 229 (24.3)    |                | <b>214</b> → | 173      | 132 |     | 1.40 | 131-215         |
| Propyzamide               | 256.1                   | 12.45       | <b>173</b>        | 175 (41.2)    | 254 (35.6)    |               |                | <b>173</b> → | 138      | 145 |     | 1.10 | 130-174         |
| Diazinon                  | 304.4                   | 12.46       | <b>137</b>        | 179 (44.7)    | 304 (10.2)    |               |                | <b>179</b> → | 121      | 163 | 137 | 1.35 | 110-180         |
| Fonofos                   | 246.3                   | 12.51       | <b>137</b>        | 109 (70.7)    | 246 (40.0)    |               |                | <b>137</b> → | 109      | 81  |     | 0.85 | 80-138          |
| Pirimicarb                | 238.4                   | 13.10       | <b>166</b>        | 238 (29.0)    | 72 (18.8)     |               |                | <b>166</b> → | 96       | 137 | 121 | 1.35 | 95-167          |
| Parathion-methyl          | 263.2                   | 13.98       | <b>263</b>        | 109 (67.9)    | 79 (44.7)     | 246 (43.5)    |                | <b>263</b> → | 246      | 153 |     | 1.31 | 150-264         |
| Alachlor <sup>a</sup>     | 269.8                   | 14.01       | <b>188</b>        | 160 (86.8)    | 146 (58.8)    |               |                | <b>160</b> → | 132      | 130 |     | 1.10 | 116-161         |
| Simetryn                  | 213.3                   | 14.10       | <b>213</b>        | 170 (22.9)    | 155 (13.4)    |               |                | <b>213</b> → | 170      | 185 |     | 1.10 | 151-214         |
| Heptachlor <sup>b</sup>   | 373.3                   | 14.25       | <b>272</b>        | 274 (73.9)    | 270 (63.3)    | 100 (43.9)    |                | <b>272</b> → | 237      | 235 |     | 1.05 | 236-275         |
| Metribuzin                | 214.3                   | 14.43       | <b>198</b>        | 199 (29.8)    |               |               |                | <b>198</b> → | 150      | 110 |     | 1.10 | 109-199         |
| Terbutryn                 | 241.4                   | 14.67       | <b>185</b>        | 226 (68.0)    | 170 (45.2)    |               |                | <b>185</b> → | 170      | 128 |     | 0.90 | 127-186         |
| Fenitrothion              | 277.2                   | 14.71       | <b>260</b>        | 109 (83.4)    | 125 (77.4)    | 277 (41.8)    |                | <b>260</b> → | 228      | 217 | 232 | 1.20 | 160-261         |
| Malathion                 | 330.4                   | 14.95       | <b>125</b>        | 127 (90.9)    | 99 (73.2)     | 173 (40.2)    |                | <b>173</b> → | 99       | 117 | 145 | 0.80 | 92-173          |
| Metolachlor               | 283.8                   | 15.12       | <b>162</b>        | 238 (36.7)    | 163 (15.1)    |               |                | <b>162</b> → | 132      | 133 |     | 1.15 | 115-163         |
| Chlorpyrifos              | 350.6                   | 15.19       | <b>314</b>        | 316 (72.3)    | 258 (67.3)    | 199 (46.8)    | 197 (41.4)     | <b>314</b> → | 258      | 286 |     | 0.90 | 257-315         |
| Cyanazine                 | 240.7                   | 15.26       | <b>225</b>        | 212 (59.4)    | 198 (35.2)    | 68 (32.8)     |                | <b>225</b> → | 189      | 172 | 198 | 1.28 | 171-226         |
| Aldrin <sup>a</sup>       | 364.9                   | 15.35       | <b>263</b>        | 261 (92.7)    | 265 (65.6)    | 66 (57.2)     |                | <b>263</b> → | 193      | 191 | 227 | 1.60 | 190-264         |
| Parathion-ethyl           | 291.3                   | 15.38       | <b>291</b>        | 109 (79.0)    | 263 (61.0)    | 97 (57.2)     | 141 (47.0)     | <b>109</b> → | 81       | 91  |     | 0.99 | 60-110          |
| Pendimethalin             | 281.3                   | 16.27       | <b>252</b>        | 162 (61.3)    | 191 (28.9)    |               |                | <b>252</b> → | 162      | 191 |     | 1.00 | 160-253         |
| Chlorfenvinphos Z         | 359.6                   | 16.53       | <b>267</b>        | 269 (52.9)    | 323 (51.5)    |               |                | <b>267</b> → | 159      | 203 |     | 1.50 | 158-268         |
| Heptachlor epoxid         | 389.3                   | 16.53       | <b>353</b>        | 355 (66.0)    | 351 (44.4)    | 81 (25.7)     |                | <b>353</b> → | 263      | 282 |     | 1.10 | 262-354         |
| Procyimdone               | 284.1                   | 16.86       | <b>96</b>         | 283 (85.3)    | 285 (29.0)    |               |                | <b>96</b> →  | 67       | 68  |     | 1.00 | 64-97           |
| Chlordane (gamma)         | 338.9                   | 17.28       | <b>375</b>        | 373 (93.8)    | 377 (59.9)    |               |                | <b>373</b> → | 266      | 264 |     | 1.20 | 263-374         |
| Tetrachlorvinphos         | 366.0                   | 17.40       | <b>329</b>        | 331 (90.4)    | 109 (51.3)    | 333 (32.8)    |                | <b>329</b> → | 314      | 278 |     | 1.30 | 219-330         |
| Endosulfan (beta)         | 406.9                   | 17.70       | <b>241</b>        | 195 (72.7)    | 243 (71.2)    | 207 (54.0)    |                | <b>241</b> → | 206      | 204 | 170 | 1.45 | 165-242         |
| Fenamiphos                | 303.4                   | 17.87       | <b>303</b>        | 243 (62.4)    | 217 (54.9)    | 288 (42.9)    | 154 (40.6)     | <b>303</b> → | 268      | 266 |     | 1.10 | 175-304         |
| 4,4'-DDE                  | 318.0                   | 18.40       | <b>246</b>        | 248 (58.6)    | 318 (31.9)    | 316 (29.3)    |                | <b>246</b> → | 176      | 175 |     | 1.70 | 174-247         |
| Dieldrin <sup>a</sup>     | 380.9                   | 18.60       | <b>79</b>         | 263 (93.1)    | 237 (43.5)    |               |                | <b>79</b> →  | 51       | 50  |     | 1.10 | 49-80           |
| Endosulfan (alpha)        | 406.9                   | 18.60       | <b>241</b>        | 195 (78.2)    | 237 (70.8)    | 243 (65.5)    |                | <b>241</b> → | 206      | 205 |     | 1.45 | 165-242         |
| Endrin <sup>b</sup>       | 380.9                   | 18.61       | <b>243</b>        | 263 (99.0)    | 281 (68.4)    | 81 (47.4)     |                | <b>243</b> → | 207      | 173 |     | 1.15 | 172-244         |
| 4,4'-DDD                  | 320.0                   | 19.84       | <b>235</b>        | 237 (64.2)    | 165 (61.7)    |               |                | <b>235</b> → | 165      | 199 |     | 1.15 | 162-236         |
| Endosulfan sulfate        | 422.9                   | 20.95       | <b>272</b>        | 237 (68.0)    | 274 (60.5)    | 387 (47.9)    |                | <b>272</b> → | 237      | 235 |     | 1.10 | 234-273         |
| <u>DDT-ds</u>             | 362.5                   | 21.03       | <b>220</b>        | 243 (62.6)    | 280 (57.8)    |               |                | <b>243</b> → | 173      | 206 |     | 1.15 | 172-244         |
| 4,4'-DDT                  | 354.5                   | 21.11       | <b>235</b>        | 237 (64.2)    | 212 (59.0)    | 165 (44.0)    |                | <b>235</b> → | 165      | 199 |     | 1.15 | 117-236         |
| Methoxychlor <sup>b</sup> | 345.7                   | 23.08       | <b>227</b>        | 228 (16.5)    | 274 (15.4)    |               |                | <b>227</b> → | 169      | 181 |     | 1.30 | 140-228         |
| Azinphos-methyl           | 317.3                   | 23.85       | <b>77</b>         | 132 (88.0)    | 104 (43.4)    | 160 (32.9)    |                | <b>77</b> →  | 51       | 50  |     | 1.30 | 49-78           |
| Tebuconazole              | 307.8                   | 24.44       | <b>250</b>        | 125 (80.6)    | 163 (44.4)    |               |                | <b>125</b> → | 89       | 99  |     | 1.60 | 62-126          |
| Cyhalofop-butyl           | 357.4                   | 24.44       | <b>256</b>        | 357 (72.6)    | 229 (41.1)    | 120 (31.0)    |                | <b>256</b> → | 228      | 200 |     | 1.13 | 199-257         |
| Mirex                     | 545.5                   | 24.71       | <b>272</b>        | 274 (73.3)    | 237 (62.7)    |               |                | <b>272</b> → | 237      | 235 |     | 1.13 | 234-273         |
| Cyhalothrin (lamb)        | 449.9                   | 24.73       | <b>181</b>        | 141 (45.8)    | 197 (42.1)    |               |                | <b>181</b> → | 152      | 151 |     | 1.50 | 120-182         |
| Cyfluthrin (beta)         | 434.3                   | 27.71       | <b>206</b>        | 199 (76.9)    | 91 (70.9)     | 226 (55.0)    | 227 (42.2)     | <b>199</b> → | 193      | 191 | 163 | 1.80 | 190-200         |
| Cypermethrin (alp)        | 416.3                   | 28.24       | <b>181</b>        | 91 (76.3)     | 163 (75.0)    | 165 (47.3)    |                | <b>181</b> → | 152      | 151 |     | 1.70 | 150-153/179-182 |
| Difenoconazol             | 406.3                   | 31.25       | <b>265</b>        | 267 (89.9)    | 323 (68.5)    | 325 (62.2)    |                | <b>323</b> → | 265      | 249 |     | 1.35 | 245-266/321-324 |
| Deltamethrin <sup>*</sup> | 505.2                   | 32.00       | <b>181</b>        | 207 (61.4)    | 253 (58.7)    |               |                | <b>181</b> → | 152      | 151 |     | 1.70 | 150-153/179-182 |

Internal standards ; <sup>a</sup> Compounds present on the mix A (EPA 505/525); <sup>b</sup> Compounds present on the mix B (EPA 505/525); <sup>\*</sup> Contain several diastereoisomers
